# Supplementary material for: Dynamic neighbouring participation of nitrogen lone pairs on the chromogenic behaviour of trans-bis(salicylaldiminato)Pt(ii) coordination platforms
Source: Royal Society of Chemistry journal article supplement (doi:10.1039/c6dt04005e), 2016-01-01
Supplement: c6dt04005e1.pdf [file c6dt04005e1.pdf]

## Supporting Information

### Dynamic Neighbouring Participation of Nitrogen Lone Pairs on the Chromogenic Behaviour of *trans*-Bis(salicylaldiminato)Pt(II) Coordination Platforms

Takumi Hashimoto, Kanako Fukumoto, Ngoc Ha-Thu Le, Tatsuya Matsuoka, Soichiro Kawamorita, Naruyoshi Komiya, and Takeshi Naota

Department of Chemistry, Graduate School of Engineering Science, Osaka University  
Machikaneyama, Toyonaka, Osaka 560-8531, Japan

## Contents

|                                                                                                                                                                     |     |
|---------------------------------------------------------------------------------------------------------------------------------------------------------------------|-----|
| <b>Fig. S1</b> <sup>1</sup> H NMR (500 MHz) spectra of <b>1a</b> at 298 K and 243 K in CDCl <sub>3</sub> .                                                          | S2  |
| <b>Fig. S2</b> NOESY spectrum (500 MHz) of <b>3</b> in CDCl <sub>3</sub> (298 K)                                                                                    | S3  |
| <b>Fig. S3</b> NOESY spectrum (500 MHz) of <b>4</b> in CDCl <sub>3</sub> (298 K)                                                                                    | S4  |
| <b>Fig. S4</b> NOESY spectrum (500 MHz) of <b>5</b> in CDCl <sub>3</sub> (298 K)                                                                                    | S5  |
| <b>Fig. S5</b> UV-vis spectra of <b>1b</b> , <b>1c</b> , <b>2b</b> , and <b>2c</b> in CH <sub>3</sub> CN at 298 K                                                   | S6  |
| <b>Fig. S6</b> UV-vis spectra of <b>1a</b> in various solvents at 298 K                                                                                             | S7  |
| <b>Fig. S7</b> UV-vis spectra of <b>2a</b> in various solvents at 298 K                                                                                             | S7  |
| <b>Fig. S8</b> UV-vis spectra of <b>3</b> in various solvents at 298 K                                                                                              | S8  |
| <b>Fig. S9</b> UV-vis spectra of <b>4</b> in various solvents at 298 K                                                                                              | S8  |
| <b>Fig. S10</b> UV-vis spectra of <b>5</b> in various solvents at 298 K                                                                                             | S8  |
| <b>Fig. S11</b> UV-vis spectra of <b>6</b> in various solvents at 298 K                                                                                             | S9  |
| <b>Fig. S12</b> Plot of $\nu_{\max}$ (MLCT/ILCT) for <b>1a</b> and <b>2a</b> at 298 K against dipole moment $\mu$ values                                            | S10 |
| <b>Fig. S13</b> Plot of $\nu_{\max}$ (MLCT/ILCT) for <b>1a</b> and <b>2a</b> at 298 K against dielectric constant $\epsilon$ values                                 | S11 |
| <b>Fig. S14</b> Plot of $\nu_{\max}$ (MLCT/ILCT) for <b>1a</b> and <b>2a</b> at 298 K against Kamlet and Taft's solvent polarity scale $\pi^*$ values               | S12 |
| <b>Fig. S15</b> Plots of $\nu_{\max}$ (MLCT/ILCT) of <b>3</b> , <b>4</b> and <b>5</b> at 298 K against $E_T(30)$ solvent values.                                    | S13 |
| <b>Table S1</b> Calculated singlet transitions and major electronic contributions of <b>1a</b> , <b>2a</b> , <b>3</b> , <b>4</b> , <b>5</b> , and <b>6</b>          | S14 |
| <b>Fig. S16</b> Relationship between the HOMO–LUMO energy gap and wavenumber at the absorption maxima around 350–500 nm for <b>1</b> at 298 K in CH <sub>3</sub> CN | S15 |
| <b>Fig. S17</b> Relationship between the HOMO–LUMO energy gap and wavenumber at the absorption maxima around 400–500 nm for <b>2</b> at 298 K in CH <sub>3</sub> CN | S16 |
| <b>Fig. S18</b> Emission spectra of <b>6</b> in DMSO at 77 K                                                                                                        | S17 |

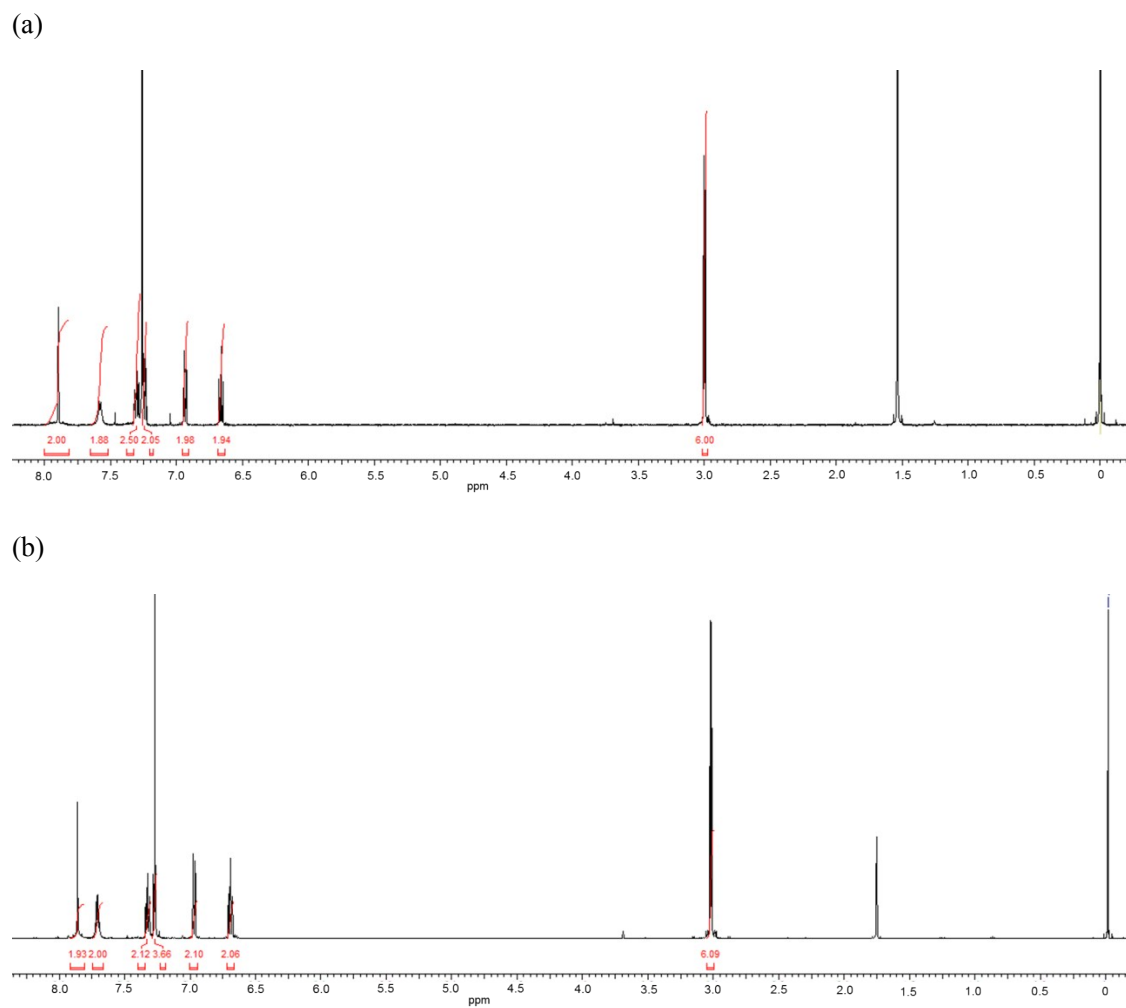

**Fig. S1**  $^1\text{H}$  NMR (500 MHz) spectra of **1a** at (a) 298 K and (b) 243 K in  $\text{CDCl}_3$ .

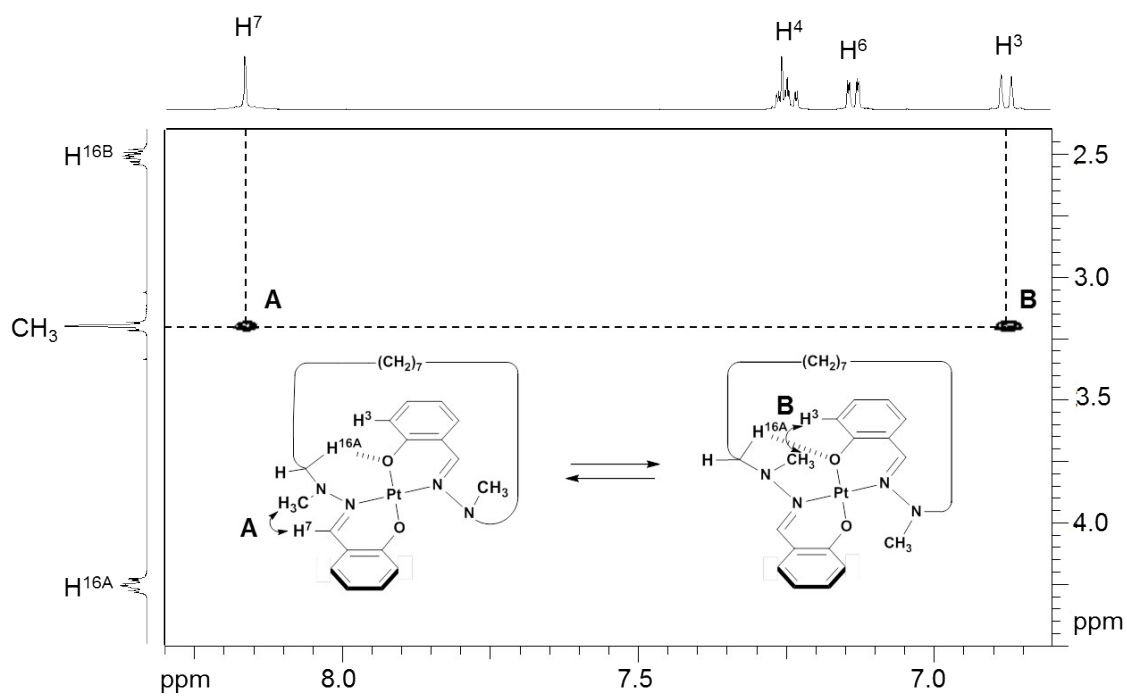

**Fig. S2** NOESY spectrum (500 MHz) of **3** in CDCl<sub>3</sub> (298 K, mixing time = 0.4 s, number of  $t_1$  increments = 1024, number of  $t_2$  increments = 512, number of scans = 68).

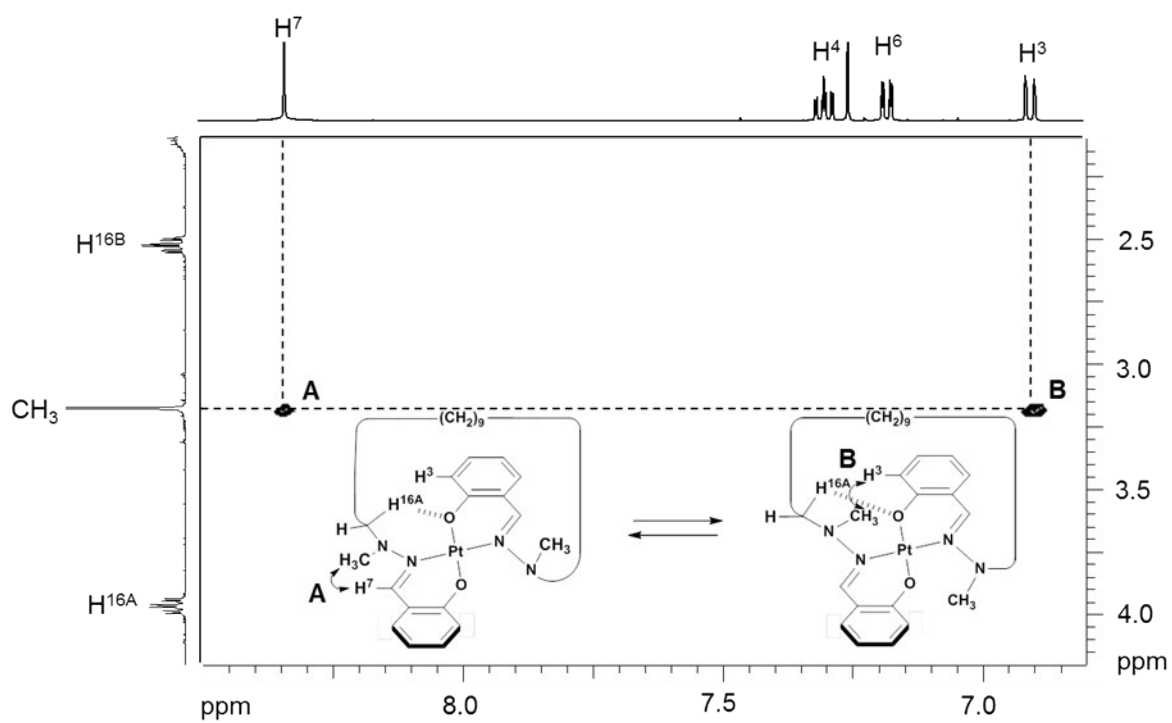

**Fig. S3** NOESY spectrum (500 MHz) of **4** in CDCl<sub>3</sub> (298 K, mixing time = 0.4 s, number of  $t_1$  increments = 1024, number of  $t_2$  increments = 512, number of scans = 68).

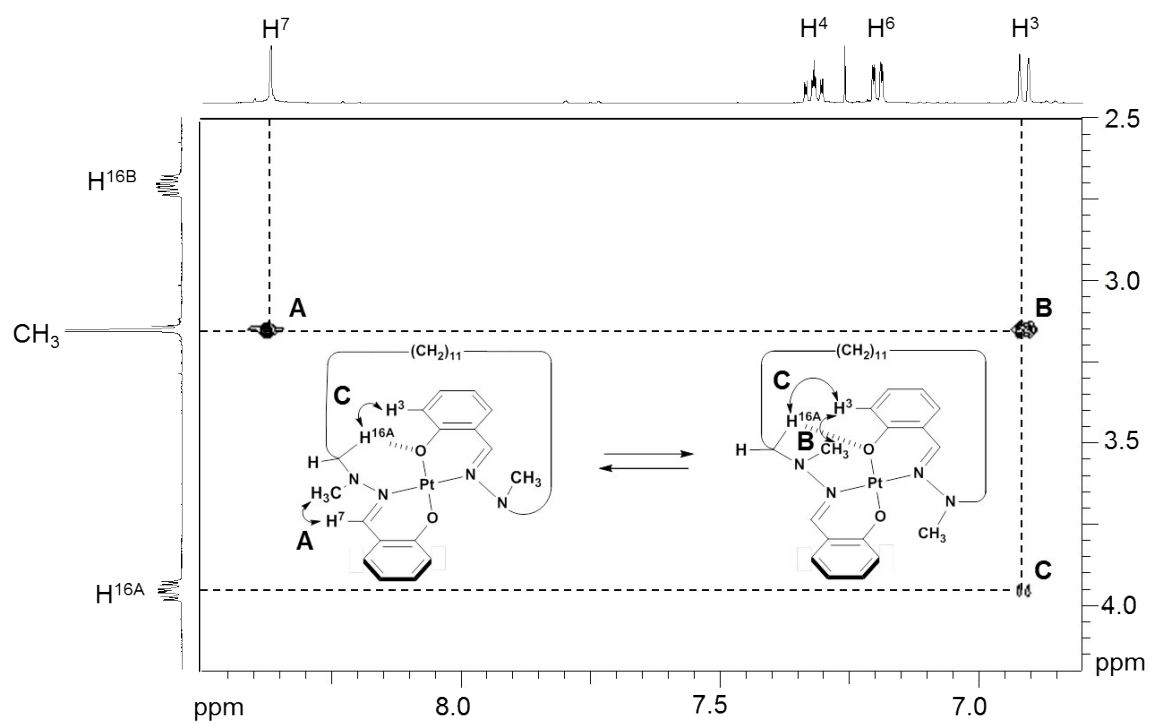

**Fig. S4** NOESY spectrum (500 MHz) of **5** in  $\text{CDCl}_3$  (298 K, mixing time = 0.4 s, number of  $t_1$  increments = 1024, number of  $t_2$  increments = 512, number of scans = 68).

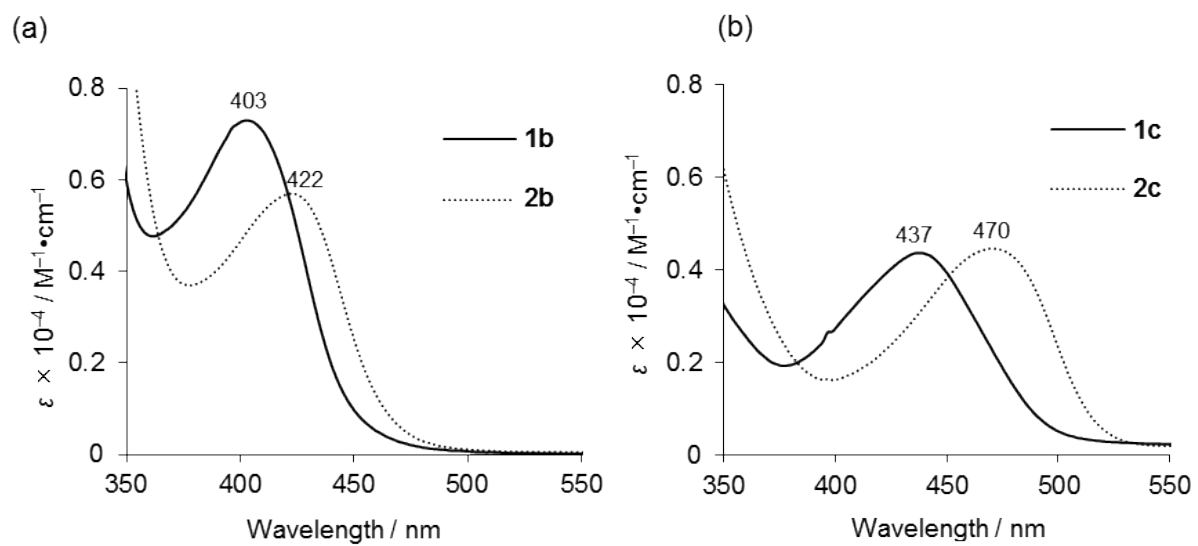

**Fig. S5** UV-vis spectra of  $2.0 \times 10^{-4}$  M solutions of (a) **1b**, (b) **1c**, (a) **2b**, and (b) **2c** in  $\text{CH}_3\text{CN}$  at 298 K.

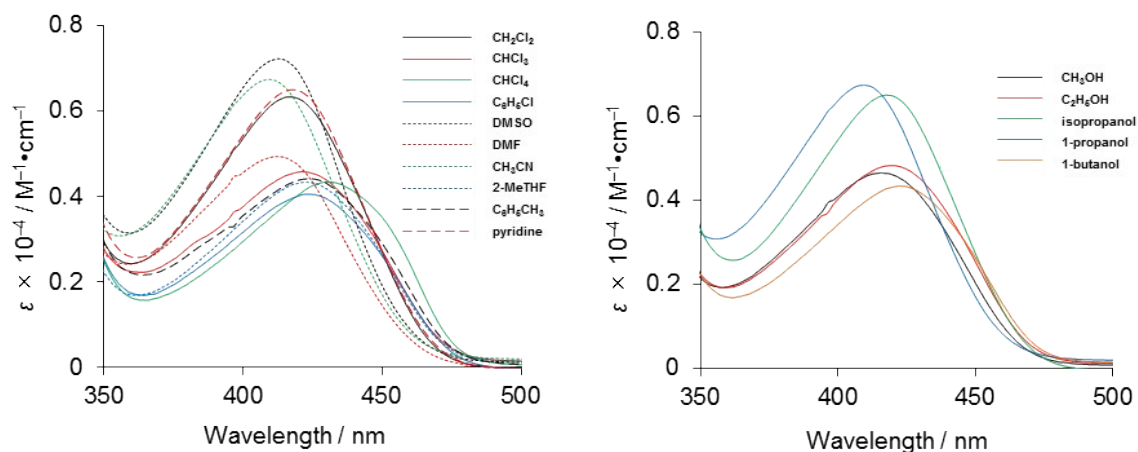

**Fig. S6** UV-vis spectra of  $2.0 \times 10^{-4}$  M solutions of **1a** in various solvents at 298 K.

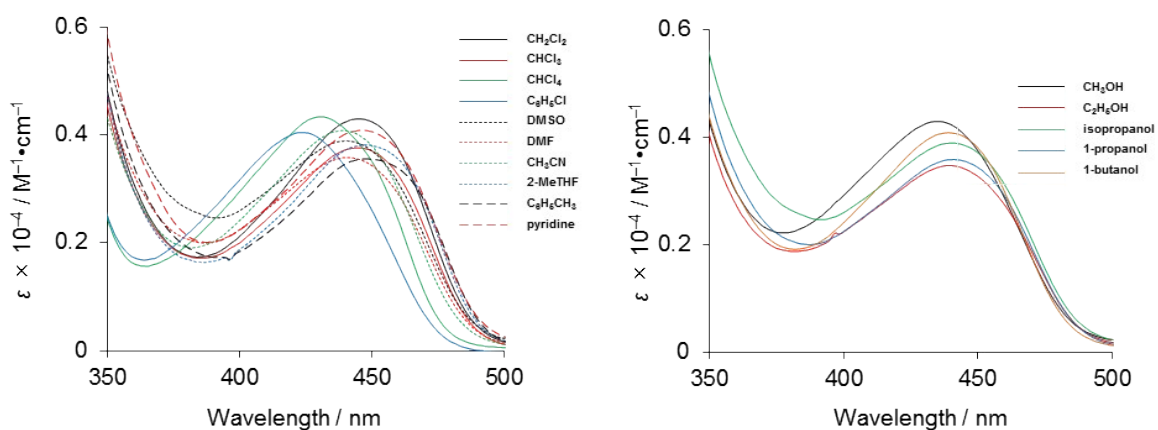

**Fig. S7** UV-vis spectra of  $2.0 \times 10^{-4}$  M solutions of **2a** in various solvents at 298 K.

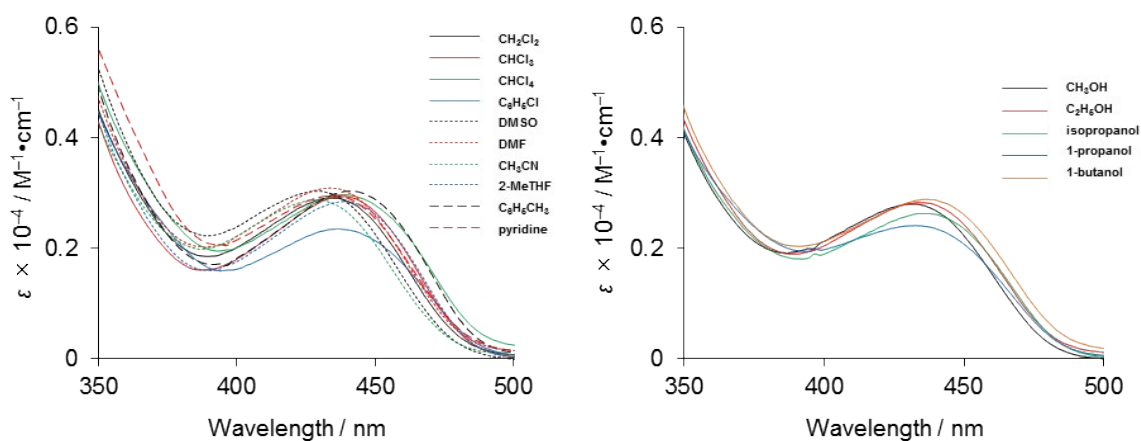

**Fig. S8** UV-vis spectra of  $2.0 \times 10^{-4}$  M solutions of **3** in various solvents at 298 K.

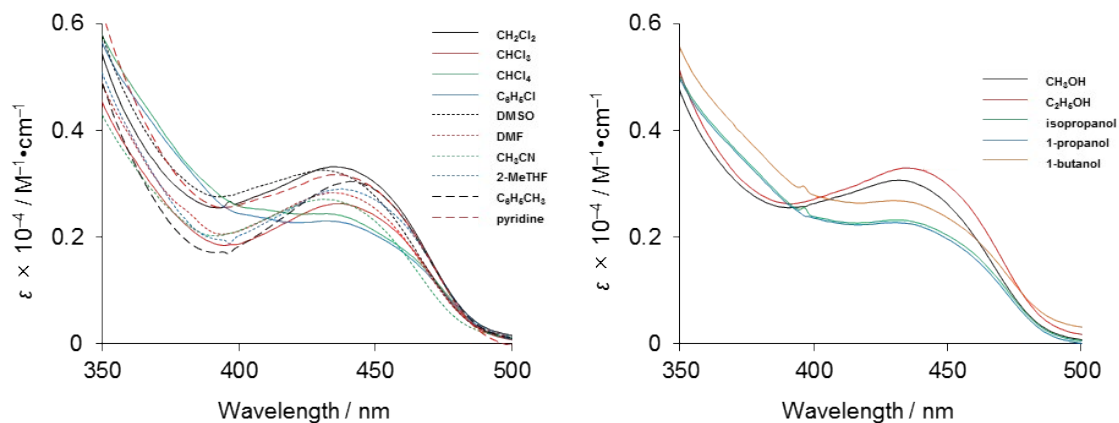

**Fig. S9** UV-vis spectra of  $2.0 \times 10^{-4}$  M solutions of **4** in various solvents at 298 K.

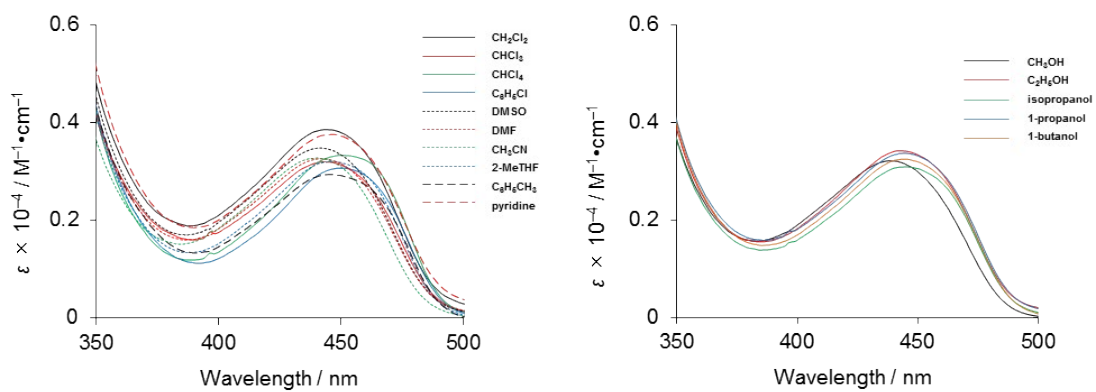

**Fig. S10** UV-vis spectra of  $2.0 \times 10^{-4}$  M solutions of **5** in various solvents at 298 K.



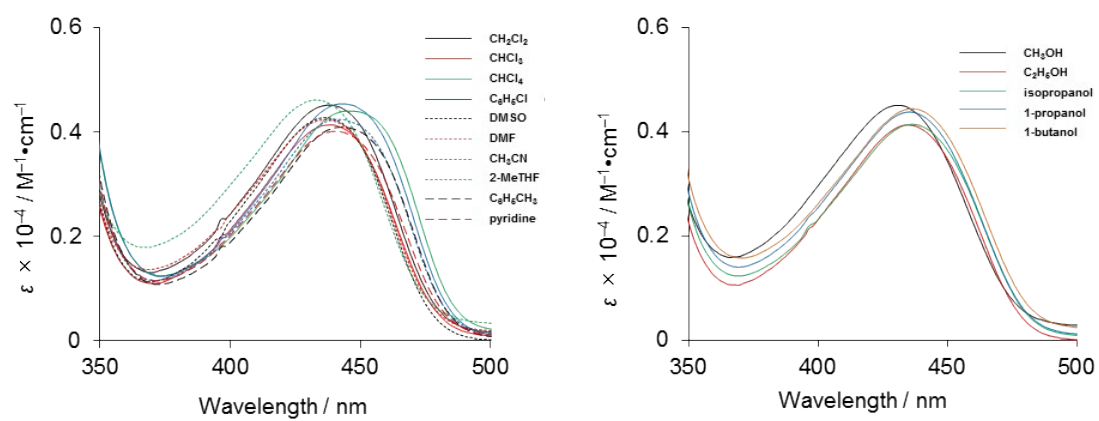

**Fig. S11** UV-vis spectra of  $2.0 \times 10^{-4} \text{ M}$  solutions of **6** in various solvents at 298 K.

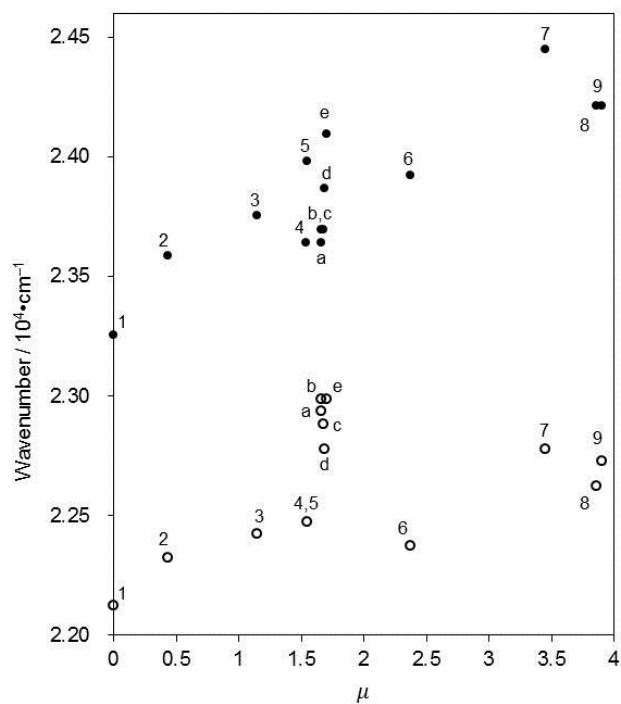

**Fig. S12** Plot of  $\nu_{\max}$  (MLCT/ILCT) for **1a** and **2a** at 298 K against dipole moment  $\mu$  values. ●: **1a**; ○: **2a**. Solvents: 1, CCl<sub>4</sub>; 2, toluene; 3, CHCl<sub>3</sub>; 4, chlorobenzene; 5, CH<sub>2</sub>Cl<sub>2</sub>; 6, pyridine; 7, CH<sub>3</sub>CN; 8, DMF; 9, DMSO; a, isopropanol; b, 1-butanol; c, 1-propanol; d, ethanol; e, methanol.

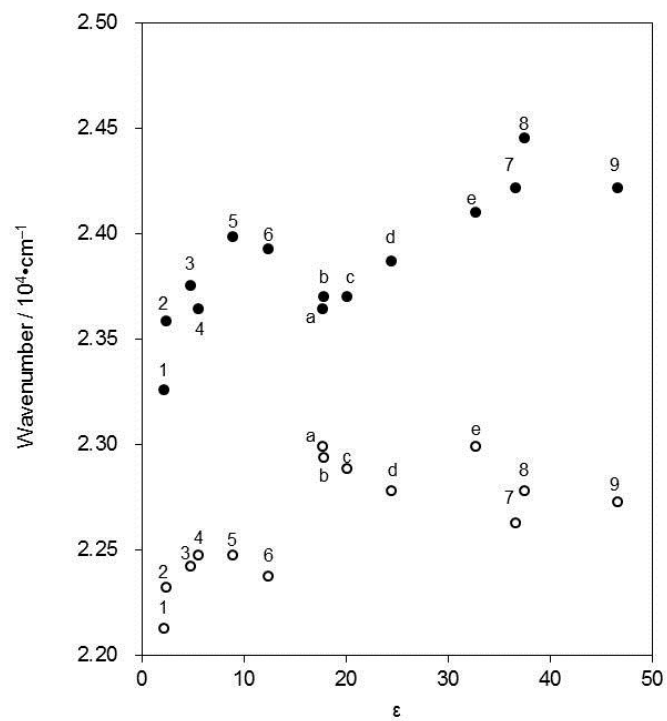

**Fig. S13** Plot of  $\nu_{\max}$  (MLCT/ILCT) for **1a** and **2a** at 298 K against dielectric constant  $\epsilon$  values. ●: **1a**; ○: **2a**. Solvents: 1,  $\text{CCl}_4$ ; 2, toluene; 3,  $\text{CHCl}_3$ ; 4, chlorobenzene; 5,  $\text{CH}_2\text{Cl}_2$ ; 6, pyridine; 7, DMF; 8,  $\text{CH}_3\text{CN}$ ; 9, DMSO; a, 1-butanol; b, isopropanol; c, 1-propanol; d, ethanol; e, methanol.

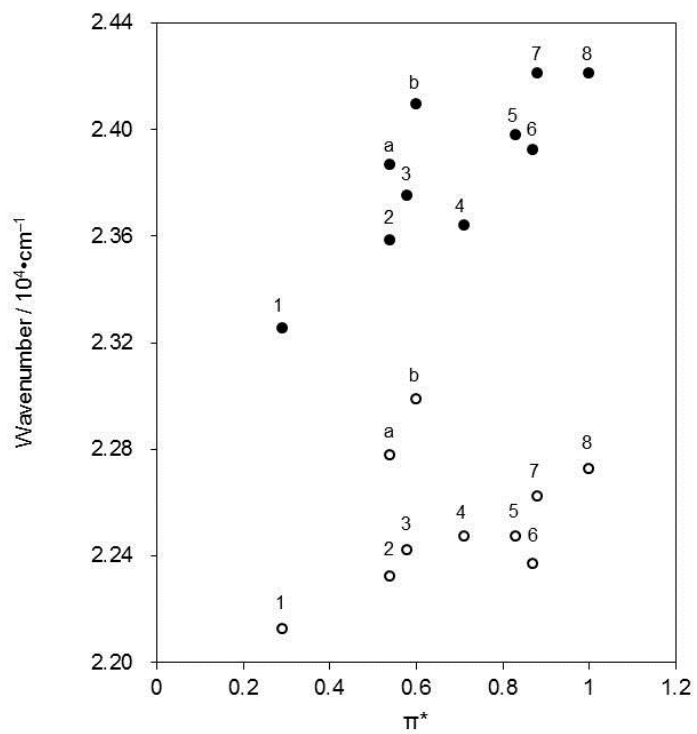

**Fig. S14** Plot of  $\nu_{\max}$  (MLCT/ILCT) for **1a** and **2a** at 298 K against Kamlet and Taft's solvent polarity scale  $\pi^*$  values. ●: **1a**; ○: **2a**. Solvents: 1, CCl<sub>4</sub>; 2, toluene; 3, CHCl<sub>3</sub>; 4, chlorobenzene; 5, CH<sub>2</sub>Cl<sub>2</sub>; 6, pyridine; 7, DMF; 8, DMSO; a, ethanol; b, methanol.

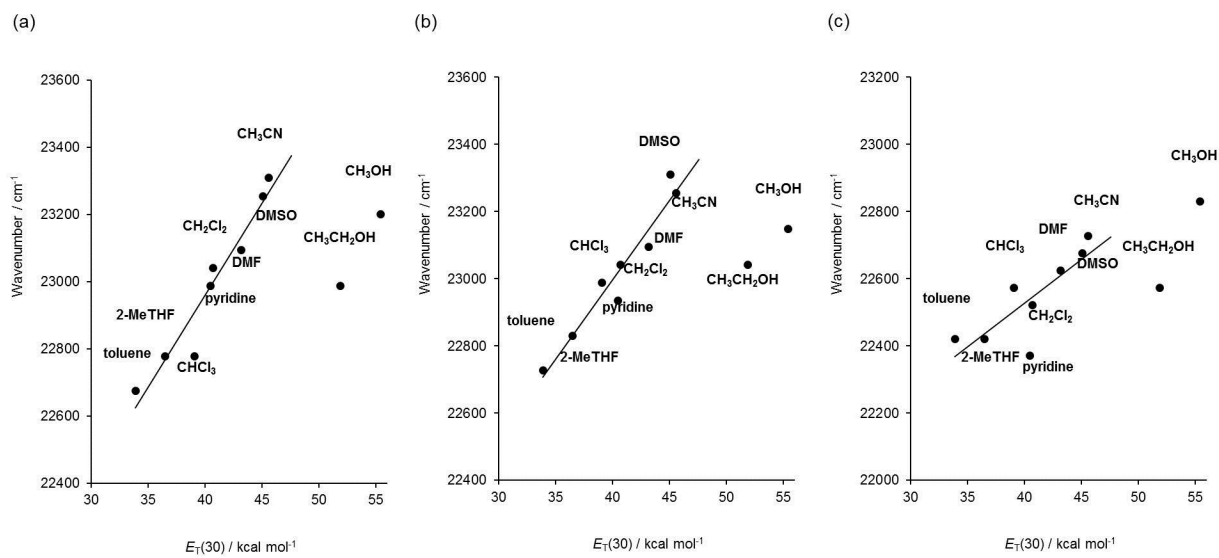

**Fig. S15** Plots of  $\nu_{\max}$  (MLCT/ILCT) of (a) **3**, (b) **4**, and (c) **5** at 298 K against  $E_T(30)$  solvent values.

**Table S1** Calculated singlet transitions and major electronic contributions of **1a**, **2a**, **3**, **4**, **5**, and **6**<sup>a</sup>

| Complex                   | State | Excitation energy / eV (nm) | Major configuration   |
|---------------------------|-------|-----------------------------|-----------------------|
| <b>1a</b>                 | S1    | 2.85 (434)                  | HOMO → LUMO (49.1%)   |
|                           | S2    | 3.16 (393)                  | HOMO → LUMO+1 (48.4%) |
|                           | S3    | 3.36 (369)                  | HOMO → LUMO+2 (46.8%) |
| <b>2a</b> (conformer II)  | S1    | 2.84 (436)                  | HOMO → LUMO (49.0%)   |
|                           | S2    | 3.10 (400)                  | HOMO → LUMO+1 (48.3%) |
|                           | S3    | 3.20 (388)                  | HOMO → LUMO+2 (46.7%) |
| <b>2a</b> (conformer III) | S1    | 2.78 (446)                  | HOMO → LUMO (49.0%)   |
|                           | S2    | 2.94 (422)                  | HOMO → LUMO+1 (42.2%) |
|                           | S3    | 3.33 (372)                  | HOMO → LUMO+2 (38.0%) |
| <b>3</b>                  | S1    | 2.83 (438)                  | HOMO → LUMO (45.7%)   |
|                           | S2    | 3.09 (401)                  | HOMO → LUMO+1 (47.5%) |
|                           | S3    | 3.28 (378)                  | HOMO → LUMO+2 (42.7%) |
| <b>4</b>                  | S1    | 2.83 (439)                  | HOMO → LUMO (46.7%)   |
|                           | S2    | 3.09 (401)                  | HOMO → LUMO+1 (48.1%) |
|                           | S3    | 3.21 (386)                  | HOMO → LUMO+2 (44.4%) |
| <b>5</b>                  | S1    | 2.83 (438)                  | HOMO → LUMO (47.8%)   |
|                           | S2    | 3.10 (400)                  | HOMO → LUMO+1 (48.0%) |
|                           | S3    | 3.23 (384)                  | HOMO → LUMO+2 (45.4%) |
| <b>6</b>                  | S1    | 2.85 (436)                  | HOMO → LUMO (49.1%)   |
|                           | S2    | 3.12 (398)                  | HOMO → LUMO+1 (47.5%) |
|                           | S3    | 3.30 (376)                  | HOMO → LUMO+2 (45.9%) |

-----  
<sup>a</sup> Estimated from TD-DFT calculations (B3LYP/6-31G\*, LanL2DZ) based on the optimized structures.

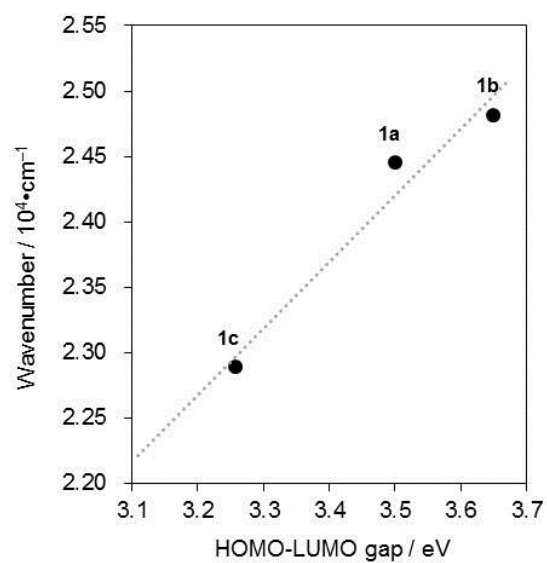

**Fig. S16** Relationship between the HOMO–LUMO energy gap (eV) and wavenumber ( $\text{cm}^{-1}$ ) at the absorption maxima around 350–500 nm for **1** at 298 K in  $\text{CH}_3\text{CN}$ . The energy gaps were estimated from DFT (B3LYP/6-31G\*, LanL2DZ) calculations based on the optimized geometries.

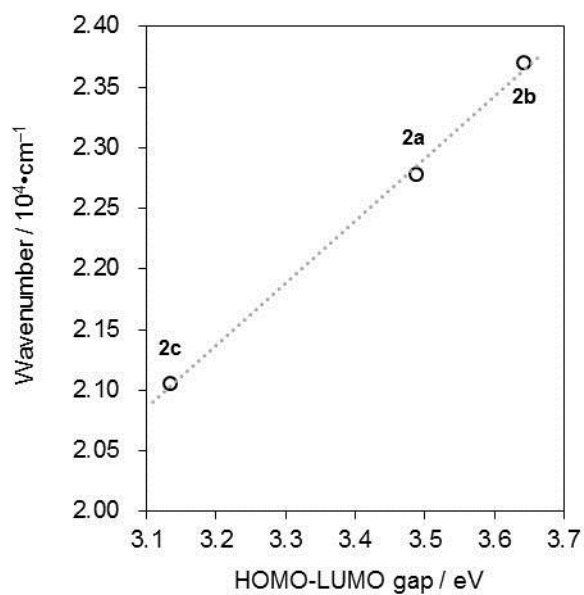

**Fig. S17** Relationship between the HOMO–LUMO energy gap (eV) and wavenumber (cm<sup>-1</sup>) at the absorption maxima around 400–500 nm for **2** at 298 K in CH<sub>3</sub>CN. The energy gaps were estimated from DFT (B3LYP/6-31G\*, LanL2DZ) calculations based on the optimized geometries.



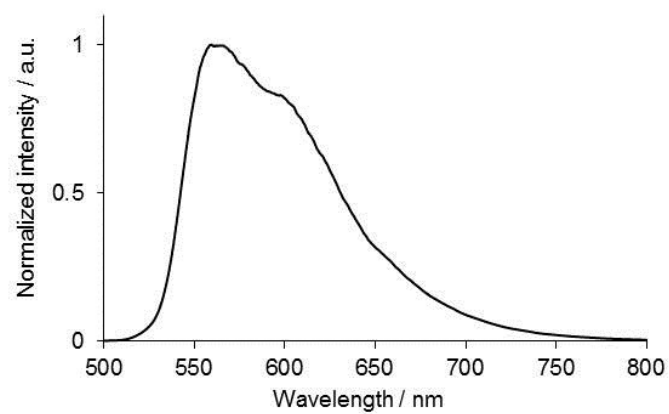

**Fig. S18** Emission spectra of  $2.0 \times 10^{-4}$  M solution **6** in DMSO at 77 K ( $\lambda_{\text{ex}} = 450$  nm).
